# Supplementary material
Source: ML conference proceedings conference paper supplement (https://proceedings.neurips.cc/paper_files/paper/2022/hash/299a08ee712d4752c890938da99a77c6-Abstract.html)
Supplement: Supplementary file 1 [file 299a08ee712d4752c890938da99a77c6-Supplemental-Conference.pdf]

# Defending Against Adversarial Attacks via Neural Dynamic System (Appendix)

## A Proof of Proposition and Theorem

$$\frac{dz(t)}{dt} = \mathbf{h}(\mathbf{z}(t), t). \quad (1)$$

Assume  $\mathbf{x}^*$  is an equilibrium of (1). We have the same meaning for  $\mathbf{x}^*$  in our Appendix.

### A.1 Proof of Theorem 1

**Theorem 1** Suppose that the perturbed instance  $\tilde{\mathbf{x}}$  is produced by adding perturbations smaller than  $\delta$  on a clean instance. If all the clean instances  $\mathbf{x} \in \mathcal{X}$  are the asymptotically stable equilibrium points of ODE (1), there exists  $\delta > 0$ , for each contaminated instance  $\hat{\mathbf{x}} \in \{\tilde{\mathbf{x}} : \tilde{\mathbf{x}} \in \tilde{\mathcal{X}}, \tilde{\mathbf{x}} \notin \mathcal{X}\}$ , there exists  $\mathbf{x} \in \mathcal{X}$  such that  $\lim_{t \rightarrow +\infty} \|\mathbf{s}(\hat{\mathbf{x}}, t) - \mathbf{x}\| = 0$ .

**Proof:**

According to the definition of asymptotic stability, A constant vector of (1) is asymptotically stable if it is stable and attractive. Based on the definition of stability of (1), for each  $\epsilon > 0$  and each  $t_0 \in \mathbb{R}^+$ , there exists  $\delta_1 = \delta(\epsilon, 0)$  such that

$$\forall \tilde{\mathbf{x}} \in B_{\delta_1}(\mathbf{x}) \Rightarrow \|\mathbf{s}(\tilde{\mathbf{x}}, t) - \mathbf{x}\| < \epsilon, \forall t \geq t_0.$$

Based on the Attractivity Definition (1), there exists  $\delta_2 = \delta(0) > 0$  such that

$$\tilde{\mathbf{x}} \in B_{\delta_2}(\mathbf{x}), \lim_{t \rightarrow +\infty} \|\mathbf{s}(\tilde{\mathbf{x}}; t) - \mathbf{x}\| = 0.$$

We make  $\delta = \min\{\delta_1, \delta_2\}$ . Because the perturbed instance  $\tilde{\mathbf{x}}$  is produced by adding perturbation smaller than  $\delta$  on the clean instance, then for each contaminated instance  $\hat{\mathbf{x}} \in \{\tilde{\mathbf{x}} : \tilde{\mathbf{x}} \in \tilde{\mathcal{X}}, \tilde{\mathbf{x}} \notin \mathcal{X}\}$ , there exists clean instance  $\mathbf{x} \in \mathcal{X}$  such that  $\hat{\mathbf{x}} \in B_{\delta}(\mathbf{x})$ . Because the clean instance  $\mathbf{x}$  is an asymptotically stable equilibrium point of (1), we have

$$\lim_{t \rightarrow +\infty} \|\mathbf{s}(\hat{\mathbf{x}}, t) - \mathbf{x}\| = 0.$$

19

■

### A.2 Proof of Theorem 2

suppose  $\mathbf{x}^*$  is an equilibrium point of nonautonomous systems (1),

$$\mathbf{h}(\mathbf{x}^*, t) = 0, \forall t \geq 0, \quad (2)$$

and  $\mathbf{h}$  is a  $C^1$  function. Define

$$\mathbf{A}(t) = \left[ \frac{\partial \mathbf{h}(\mathbf{z}, t)}{\partial \mathbf{z}} \right]_{\mathbf{z}=\mathbf{x}^*}, \quad (3)$$

$$\mathbf{h}_r(\mathbf{z}, t) = \mathbf{h}(\mathbf{z}, t) - \mathbf{A}(t)(\mathbf{z} - \mathbf{x}^*). \quad (4)$$

Then, by the definition of the Jacobian, it follows that for each fixed  $t \geq 0$ , it is true that

$$\lim_{\|\mathbf{z}\| \rightarrow \mathbf{x}^*} \frac{\|\mathbf{h}_r(\mathbf{z}, t)\|}{\|\mathbf{z} - \mathbf{x}^*\|} = 0. \quad (5)$$

24 However, it may not be true that

$$\lim_{\|\mathbf{z}\| \rightarrow \mathbf{x}^*} \sup_{t \geq 0} \frac{\|\mathbf{h}_r(\mathbf{z}, t)\|}{\|\mathbf{z} - \mathbf{x}^*\|} = 0. \quad (6)$$

25 In other words, the convergence in (5) may not be uniform in  $t$ . Provided (6) holds, the system will

$$\frac{d\mathbf{z}(t)}{dt} = \mathbf{A}(t)(\mathbf{z} - \mathbf{x}^*). \quad (7)$$

26 is called the linearization of (1) around the equilibrium  $\mathbf{x}^*$ .

27 **Lemma 1 ([1])** Suppose  $Q : \mathbb{R}^+ \rightarrow \mathbb{R}^{d \times d}$  is continuous and bounded, and that the equilibrium  $\mathbf{x}^*$   
28 of (7) is uniformly asymptotically stable. Then, for each  $t \geq 0$ , the matrix is as follows:

$$\mathbf{P}(t) = \int_t^{+\infty} \Phi^\top(\tau, t) Q(\tau) \Phi(\tau, t) d\tau$$

29 is well defined and  $\mathbf{P}(t)$  is bounded as a function of  $t$ . Here,  $\Phi(\cdot, \cdot)$  is the state transition matrix of  
30 system (7) defined in [1].

31 **Lemma 2 ([2])** Suppose that  $Q : \mathbb{R}^+ \rightarrow \mathbb{R}^{d \times d}$  is continuous and bounded and that the equilibrium  
32  $\mathbf{x}^*$  of (7) is uniformly asymptotically stable. Moreover, if the following conditions also hold:

33 (i)  $\mathbf{Q}(t)$  is symmetric and positive definite for each  $t \geq 0$  and there exists a constant  $\alpha > 0$  such that

$$\alpha(\mathbf{z} - \mathbf{x}^*)^\top (\mathbf{z} - \mathbf{x}^*) \leq (\mathbf{z} - \mathbf{x}^*)^\top \mathbf{Q}(t) (\mathbf{z} - \mathbf{x}^*), \forall \mathbf{z} \in \mathbb{R}^d, \forall t \geq 0.$$

34 (ii) The matrix  $\mathbf{A}(t)$  in (7) is bounded; i.e.,

$$m_0 := \sup_{t \geq 0} \|\mathbf{A}(t)\| < +\infty,$$

35 under these conditions, the matrix  $\mathbf{P}(t)$  defined in Lemma 1 is positive definite for each  $t \geq 0$ ;  
36 moreover, there exists a constant  $\beta > 0$  such that

$$\beta(\mathbf{z} - \mathbf{x}^*)^\top (\mathbf{z} - \mathbf{x}^*) \leq (\mathbf{z} - \mathbf{x}^*)^\top \mathbf{P}(t) (\mathbf{z} - \mathbf{x}^*), \forall \mathbf{z} \in \mathbb{R}^d, \forall t \geq 0.$$

37 **Lemma 3 ([3])** Suppose there exist constants  $a, b, c, r > 0$ ,  $p \geq 1$ , and a  $C^1$  function  $V : \mathbb{R}^d \times$   
38  $\mathbb{R}^+ \rightarrow \mathbb{R}$  such that

$$\begin{aligned} a\|\mathbf{z} - \mathbf{x}^*\|^p &\leq V(\mathbf{z} - \mathbf{x}^*, t) \leq b\|\mathbf{z} - \mathbf{x}^*\|^p, \mathbf{z} \in \mathcal{B}_r(\mathbf{x}^*), \forall t \geq 0, \\ \dot{V}(\mathbf{z} - \mathbf{x}^*, t) &\leq -c\|\mathbf{z} - \mathbf{x}^*\|^p, \forall \mathbf{z} \in \mathcal{B}_r(\mathbf{x}^*), \forall t \geq 0. \end{aligned}$$

39 Then the equilibrium  $\mathbf{x}^*$  is exponentially stable.

40 **Theorem 2** Suppose that (2) holds and  $\mathbf{h}(\mathbf{z}, t)$  is continuously differentiable. Define  $\mathbf{A}(t)$ ,  $h_r(\mathbf{z}, t)$   
41 as in (3), (4), respectively, and assume that (6) holds and  $\mathbf{A}(t)$  is bounded. If  $\mathbf{x}^*$  is an exponentially  
42 stable equilibrium of the linear system (7), then it is also an exponentially stable equilibrium of the  
43 system (1).

44 **Proof:** Since  $\mathbf{A}(t)$  is bounded and the equilibrium  $\mathbf{x}^*$  is uniformly asymptotically stable, from  
45 Lemma 2, that the matrix

$$\mathbf{P}(t) = \int_t^{+\infty} \Phi^\top(\tau, t) \Phi(\tau, t) d\tau \quad (8)$$

46 is well-defined for  $t \geq 0$ ; moreover, there exist constants  $\alpha, \beta > 0$  such that

$$\alpha(\mathbf{z} - \mathbf{x}^*)^\top (\mathbf{z} - \mathbf{x}^*) \leq (\mathbf{z} - \mathbf{x}^*)^\top \mathbf{P}(t) (\mathbf{z} - \mathbf{x}^*) \leq \beta(\mathbf{z} - \mathbf{x}^*)^\top (\mathbf{z} - \mathbf{x}^*), \forall \mathbf{z} \in \mathbb{R}^d, \forall t \geq 0. \quad (9)$$

47 Hence the function

$$V(\mathbf{z} - \mathbf{x}^*, t) = (\mathbf{z} - \mathbf{x}^*)^\top \mathbf{P}(t)(\mathbf{z} - \mathbf{x}^*)$$

48 is a decrescent positive definite function. Calculating  $\dot{V}$  for the system (1) gives

$$\begin{aligned} \dot{V}(\mathbf{z} - \mathbf{x}^*, t) &= (\mathbf{z} - \mathbf{x}^*)^\top \dot{\mathbf{P}}(t)(\mathbf{z} - \mathbf{x}^*) + \mathbf{h}(\mathbf{z} - \mathbf{x}^*, t)\mathbf{P}(t)(\mathbf{z} - \mathbf{x}^*) \\ &\quad + (\mathbf{z} - \mathbf{x}^*)^\top \mathbf{P}(t)\mathbf{h}(\mathbf{z} - \mathbf{x}^*, t) \\ &= (\mathbf{z} - \mathbf{x}^*)^\top [\dot{\mathbf{P}}(t) + \mathbf{A}^\top(t)\mathbf{P}(t) + \mathbf{P}(t)\mathbf{A}(t)](\mathbf{z} - \mathbf{x}^*) \\ &\quad + 2(\mathbf{z} - \mathbf{x}^*)^\top \mathbf{P}(t) \frac{\partial \mathbf{h}(\mathbf{z} - \mathbf{x}^*, t)}{\partial t}. \end{aligned}$$

49 However, from (8) it can be easily shown that

$$\dot{\mathbf{P}}(t) + \mathbf{A}^\top(t)\mathbf{P}(t) + \mathbf{P}(t)\mathbf{A}(t) = -\mathbf{I}.$$

50 where  $\mathbf{I}$  is the identity matrix. Therefore,

$$\dot{V}(\mathbf{z} - \mathbf{x}^*, t) = -(\mathbf{z} - \mathbf{x}^*)^\top (\mathbf{z} - \mathbf{x}^*) + 2(\mathbf{z} - \mathbf{x}^*)^\top \dot{\mathbf{P}}(t) \frac{\partial \mathbf{h}(\mathbf{z} - \mathbf{x}^*, t)}{\partial t}.$$

51 In the view of (6), one can pick a number  $r > 0$  and a  $\rho < 0.5$  such that

$$\left\| \frac{\partial \mathbf{h}(\mathbf{z} - \mathbf{x}^*, t)}{\partial t} \right\| \leq \frac{\rho}{\beta} \|\mathbf{z} - \mathbf{x}^*\|, \forall \mathbf{z} \in \mathbf{B}_r(\mathbf{x}^*), \forall t \geq 0. \quad (10)$$

52 Then (10) and (9) together imply that

$$\left| 2(\mathbf{z} - \mathbf{x}^*)^\top \mathbf{P}(t) \frac{\partial \mathbf{h}(\mathbf{z} - \mathbf{x}^*, t)}{\partial t} \right| \leq \frac{2\rho}{\beta} (\mathbf{z} - \mathbf{x}^*)^\top (\mathbf{z} - \mathbf{x}^*), \forall \mathbf{z} \in \mathbf{B}_r(\mathbf{x}^*), \forall t \geq 0.$$

53 therefore,

$$\dot{V}(\mathbf{z} - \mathbf{x}^*, t) \leq -(1 - 2\rho)(\mathbf{z} - \mathbf{x}^*)^\top (\mathbf{z} - \mathbf{x}^*), \mathbf{z} \in \mathbf{B}_r(\mathbf{x}^*), \forall t \geq 0.$$

54 this shows that  $-\dot{V}$  is a locally positive definite function. Based on Lemma 3, we conclude that  $\mathbf{x}^*$   
55 is an exponentially stable equilibrium. ■

56

### 57 A.3 Proof of Theorem 3

58 **Lemma 4 (Gronwall [4])** Suppose  $a(t): \mathbb{R}^+ \rightarrow \mathbb{R}^+$  is a continuous function and  $b, c \geq 0$  are given  
59 constants. Under these conditions, if

$$a(t) \leq b + \int_0^t ca(\tau)d\tau, \forall t \geq 0,$$

60 then

$$a(t) \leq b \exp(ct), \forall t \geq 0.$$

61 **Lemma 5 ([2])** Consider the system (1), and suppose  $\mathbf{h}$  is  $C^k$ , and that  $\mathbf{h}(\mathbf{x}^*, t) = 0, \forall t \geq 0$ .  
62 Suppose that there exist constants  $\mu, \delta, r > 0$  such that

$$\|\mathbf{s}(\mathbf{z} - \mathbf{x}^*, t, \tau)\| \leq \mu \|\mathbf{z} - \mathbf{x}^*\| \exp(-\delta(\tau - t)), \forall \tau \geq t \geq 0, \mathbf{z} \in \mathbf{B}_r(\mathbf{x}^*).$$

63 Finally, suppose that, for some finite constant  $\eta$ ,

$$\|\nabla \mathbf{h}(\mathbf{z} - \mathbf{x}^*, t)\| \leq \eta, \forall t \geq 0, \mathbf{z} \in \mathbf{B}_{\mu r}(\mathbf{x}^*)$$

64 Under these conditions, there exist a  $C^k$  function  $V: \mathbb{R}^d \times \mathbb{R}^+ \rightarrow \mathbb{R}$  and constants  $a, b, c, m >$   
65  $0, p > 1$ , such that

$$a\|\mathbf{z} - \mathbf{x}^*\|^p \leq V(\mathbf{z} - \mathbf{x}^*, t) \leq b\|\mathbf{z} - \mathbf{x}^*\|^p, \dot{V}(\mathbf{z} - \mathbf{x}^*, t) \leq -c\|\mathbf{z} - \mathbf{x}^*\|^p, \forall \mathbf{z} \in \mathbf{B}_r(\mathbf{x}^*), \forall t \geq 0,$$

66

$$\left\| \frac{\partial V(\mathbf{z} - \mathbf{x}^*, t)}{\partial \mathbf{z}} \right\| \leq m\|\mathbf{z} - \mathbf{x}^*\|^{p-1}, \forall \mathbf{z} \in \mathbf{B}_r(\mathbf{x}^*), \forall t \geq 0.$$

67 We first prove the general case of the Theorem 3 in our main paper. We introduce the frozen system.

$$\frac{d\mathbf{z}(t)}{dt} = \mathbf{h}(\mathbf{z}(t), r). \quad (11)$$

68 we use  $\mathbf{s}_r(\mathbf{z}, \tau, t)$  to denote the frozen system (11) solution, starting at time  $\tau$  and state  $\mathbf{z}$ , and  
69 evaluated at time  $t$ .

70 **Theorem 3 (general)** Consider the system (1). Suppose (i)  $\mathbf{h}$  is  $C^1$  and (ii)

$$\sup_{\mathbf{z} \in \mathbb{R}^n} \sup_{t \geq 0} \|\nabla \mathbf{h}(\mathbf{z} - \mathbf{x}^*, t)\| = \eta < \infty. \quad (12)$$

71 (iii) there exist constants  $\mu, \delta$  such that

$$\|\mathbf{s}_r(\mathbf{z} - \mathbf{x}^*, \tau, t)\| \leq \mu \|\mathbf{z} - \mathbf{x}^*\| \exp(-\delta(t - \tau)), \forall t \geq \tau \geq 0, \forall \mathbf{z} \in \mathbb{R}^n, r \in \mathbb{R}^+. \quad (13)$$

72 (iv), suppose that there is a constant  $\epsilon > 0$  such that

$$\left\| \frac{\partial \mathbf{h}(\mathbf{z} - \mathbf{x}^*, t)}{\partial t} \right\| \leq \epsilon \|\mathbf{z} - \mathbf{x}^*\|, \forall t \geq 0, \forall \mathbf{z} \in \mathbb{R}^n. \quad (14)$$

73 Then the nonautonomous system (1) is exponentially stable, provided that

$$\epsilon < \frac{\delta[(p-1)\delta - \eta]}{p\mu^p}, \quad (15)$$

74 where  $p > 1$  is any number such that  $(p-1)\delta - \eta > 0$ .

75

76 **Proof:**

77 We begin by estimating the rate of variation of the function  $\mathbf{s}_r(\mathbf{z} - \mathbf{x}^*, 0, t)$  with respect to  $r$ . From  
78 (11), it follows that

$$\mathbf{s}_r(\mathbf{z} - \mathbf{x}^*, 0, t) = \mathbf{z} - \mathbf{x}^* + \int_0^t \mathbf{h}(\mathbf{s}_r(\mathbf{z} - \mathbf{x}^*, 0, \sigma), r) d\sigma.$$

79 Differentiating with respect  $r$  gives

$$\frac{\partial \mathbf{s}_r(\mathbf{z} - \mathbf{x}^*, 0, t)}{\partial r} = \int_0^t \left( \frac{\partial \mathbf{h}(\mathbf{s}_r(\mathbf{z} - \mathbf{x}^*, 0, \sigma), r)}{\partial r} + \frac{\partial \mathbf{h}(\mathbf{s}_r(\mathbf{z} - \mathbf{x}^*, 0, \sigma), r)}{\partial \mathbf{s}_r} \frac{\partial \mathbf{s}_r(\mathbf{z} - \mathbf{x}^*, 0, \sigma)}{\partial r} \right) d\sigma. \quad (16)$$

80 For conciseness, define

$$g(t) = \left\| \frac{\partial \mathbf{s}_r(\mathbf{z} - \mathbf{x}^*, 0, t)}{\partial r} \right\|,$$

81 and note from (14) that

$$\left\| \frac{\partial \mathbf{h}(\mathbf{s}_r(\mathbf{z} - \mathbf{x}^*, 0, \sigma), r)}{\partial t} \right\| \leq \epsilon \|\mathbf{s}_r(\mathbf{z} - \mathbf{x}^*, 0, \sigma)\| \leq \epsilon \mu \|\mathbf{z} - \mathbf{x}^*\| \exp(-\delta\sigma). \quad (17)$$

82 Using (12),(17) in (16), we have

$$\begin{aligned} g(t) &\leq \int_0^t \epsilon \mu \|\mathbf{z} - \mathbf{x}^*\| \exp(-\delta\sigma) d\sigma + \int_0^t \eta g(\sigma) d\sigma \\ &\leq \frac{\epsilon \mu \|\mathbf{z} - \mathbf{x}^*\|}{\delta} + \int_0^t \eta g(\sigma) d\sigma. \end{aligned} \quad (18)$$

83 Applying Lemma 4 to (18) gives

$$\left\| \frac{\partial \mathbf{s}_r(\mathbf{z} - \mathbf{x}^*, 0, t)}{\partial r} \right\| = g(t) \leq \frac{\epsilon \mu \|\mathbf{z} - \mathbf{x}^*\|}{\delta} \exp(\eta t), \forall t \geq 0. \quad (19)$$

84 For each  $r \geq 0$ , define a Lyapunov function  $V_r : \mathbb{R}^d \rightarrow \mathbb{R}$  for the system (11). Select  $p > 1 + \frac{\eta}{\delta}$ ,  
 85 and define

$$V_r(\mathbf{z}) = \int_0^{+\infty} \|\mathbf{s}_r(\mathbf{z} - \mathbf{x}^*, 0, t)\|^p dt.$$

86 Since the system (11) is autonomous, we replace  $r$  by  $\tau$ , and define  $V : \mathbb{R}^d \times \mathbb{R}^+ \rightarrow \mathbb{R}$  by

$$V(\mathbf{z}, \tau) = \int_0^{+\infty} \|\mathbf{s}_\tau(\mathbf{z} - \mathbf{x}^*, 0, t)\|^p dt, \quad (20)$$

87 then, as shown in the lemma 5.

$$\frac{1}{2^{(p+1)\eta\mu}} \|\mathbf{z} - \mathbf{x}^*\|^p \leq V(\mathbf{z} - \mathbf{x}^*, \tau) \leq \frac{\mu^p}{p\delta} \|\mathbf{z} - \mathbf{x}^*\|^p. \quad (21)$$

88

$$\frac{\partial V(\mathbf{z} - \mathbf{x}^*, \tau)}{\partial \mathbf{z}} \mathbf{h}(\mathbf{z} - \mathbf{x}^*, \tau) = -\|\mathbf{z} - \mathbf{x}^*\|^p.$$

89 Let us compute the derivative  $\dot{V}(\mathbf{z} - \mathbf{x}^*, \tau)$  along the trajectories of (1). By definition

$$\dot{V}(\mathbf{z} - \mathbf{x}^*, \tau) = \frac{\partial V(\mathbf{z} - \mathbf{x}^*, \tau)}{\partial \mathbf{z}} \mathbf{h}(\mathbf{z} - \mathbf{x}^*, \tau) + \frac{\partial V(\mathbf{z} - \mathbf{x}^*, \tau)}{\partial \tau} = \frac{\partial V(\mathbf{z} - \mathbf{x}^*, \tau)}{\partial \tau} - \|\mathbf{z} - \mathbf{x}^*\|^p. \quad (22)$$

90 It only remains to estimate  $\frac{\partial V(\mathbf{z}, \tau)}{\partial \tau}$ , let  $\gamma := \frac{p}{2}$ , then, from (20),

$$\begin{aligned} \frac{\partial V(\mathbf{z} - \mathbf{x}^*, \tau)}{\partial \tau} &= \int_0^{+\infty} \frac{\partial [\mathbf{s}_\tau^\top(\mathbf{z} - \mathbf{x}^*, 0, t) \mathbf{s}_\tau(\mathbf{z} - \mathbf{x}^*, 0, t)]^\gamma}{\partial \tau} dt \\ &= \int_0^{+\infty} 2\gamma [\mathbf{s}_\tau^\top(\mathbf{z} - \mathbf{x}^*, 0, t) \mathbf{s}_\tau(\mathbf{z} - \mathbf{x}^*, 0, t)]^{\gamma-1} \mathbf{s}_\tau^\top(\mathbf{z} - \mathbf{x}^*, 0, t) \frac{\partial \mathbf{s}_\tau(\mathbf{z}, 0, t)}{\partial \tau} dt \\ \left| \frac{\partial V(\mathbf{z} - \mathbf{x}^*, \tau)}{\partial \tau} \right| &\leq \int_0^{+\infty} 2\gamma \|\mathbf{s}_\tau(\mathbf{z} - \mathbf{x}^*, 0, t)\|^{\gamma-1} \left\| \frac{\partial \mathbf{s}_\tau(\mathbf{z} - \mathbf{x}^*, 0, t)}{\partial \tau} \right\| dt. \end{aligned}$$

91 Now use the bound in (13) for  $\|\mathbf{s}_\tau(\mathbf{z} - \mathbf{x}^*, 0, t)\|$  and (19) for  $\frac{\partial \mathbf{s}_\tau(\mathbf{z} - \mathbf{x}^*, 0, t)}{\partial \tau}$ , and note that  $2\gamma = p$ .  
 92 This gives

$$\begin{aligned} \left| \frac{\partial V(\mathbf{z} - \mathbf{x}^*, \tau)}{\partial \tau} \right| &\leq \int_0^{+\infty} p\mu^{p-1} \|\mathbf{z} - \mathbf{x}^*\|^{p-1} \frac{\epsilon\mu \|\mathbf{z} - \mathbf{x}^*\|}{\delta} \exp[-(p-1)\delta t + \eta t] dt \\ &= \frac{p\epsilon\mu^p}{\delta[(p-1)\delta - \eta]} \|\mathbf{z} - \mathbf{x}^*\|^p. \end{aligned}$$

93 Let  $m$  denote the constant multiplying  $\|\mathbf{z} - \mathbf{x}^*\|^p$  on the right side, and note that  $m < 1$  by (15).  
 94 Finally, from (22)

$$\dot{V}(\mathbf{z} - \mathbf{x}^*, t) \leq -(1 - m)\|\mathbf{z} - \mathbf{x}^*\|^p. \quad (23)$$

95 Now (21) and (23) show that  $V$  is a suitable Lyapunov function for applying the Lemma 5 to conclude  
 96 the exponential stability. And we get Theorem 3 in the main paper when we set the initial time  $\tau = 0$ .

97 ■

## 98 B ASODE algorithm

99 The architecture of our ASODE is presented in Figure 4 in our main paper and the process of ASODE  
 100 is illustrated in Section 5.3. We transform them into ASODE algorithm 1.

---

**Algorithm 1** ASODE algorithm

---

**Input:** Training data  $S := \{(\mathbf{x}_1, \mathbf{y}_1), \dots, (\mathbf{x}_N, \mathbf{y}_N)\}$ ; parameters:  $\alpha_1, \alpha_2$ ; evolution time:  $T$ ; the number of samples drawn from the neighbor of  $\mathbf{x}_n$ :  $K$ ; the radius of neighbourhood of  $\mathbf{x}_n$ :  $\delta$ ; batch size  $m$ ; number of batches  $M$ ; number of epochs  $T_1, T_2$ ; the loss  $L_{ODE}$  and  $L_{model}$ ; stepsize:  $\eta_1, \eta_2$ ; an algorithm for generating adversarial samples:  $AS(L, \mathbf{x})$ .

**Initialization:**  $\theta, \tilde{\theta}$ .

**for** epoch = 1 **to**  $T_1$  **do**

**for** mini-batch = 1 **to**  $M$  **do**

    Sample a mini-batch  $\{(\mathbf{x}_n, y_n)\}_{n=1}^m$  from  $S$

**for**  $i = 1$  **to**  $m$  **do**

      sample  $\mathbf{x}_i^{(1)}, \dots, \mathbf{x}_i^{(K)}$  from  $B_\delta(\mathbf{x}_i)$ ;

**end for**

    Update  $\theta = \theta - \eta_1 \frac{\partial L_{ODE}}{\partial \theta}$ ;

**end for**

**end for**

**for** epoch = 1 **to**  $T_2$  **do**

**for** mini-batch = 1 **to**  $M$  **do**

    Sample a mini-batch  $\{(\mathbf{x}_n, y_n)\}_{n=1}^m$  from  $S$

    Update  $\tilde{\theta} = \tilde{\theta} - \eta_2 \frac{\partial L_{model}}{\partial \tilde{\theta}}$ ;

**end for**

**end for**

**Output:**  $\theta, \tilde{\theta}$ .

---

## 101 References

- 102 [1] Chi-Tsong Chen. Linear system theory and design. 1999.
- 103 [2] Mathukumalli Vidyasagar. *Nonlinear systems analysis*. 2002.
- 104 [3] Aleksandr Mikhailovich Lyapunov. The general problem of the stability of motion. *International*
- 105 *journal of control*, 55(3):531–534, 1992.
- 106 [4] Richard Bellman. *Stability theory of differential equations*. 2008.
